# Supplementary material for: Quantifying unpredictability: A multiple-model approach based on satellite imagery data from Mediterranean ponds
Source: PLoS One. 2017 Nov 9;12(11):e0187958. doi: 10.1371/journal.pone.0187958 (PMC5679618; doi:10.1371/journal.pone.0187958)
Supplement: S2 Table — (XLSX) [file pone.0187958.s004.xlsx]

## Sheet: complete_time_series_20ponds
S2 Table. Number of pixel assigned to water cover and to cloud cover in each pond (columns) and satellite scene (rows)
Date	Year	DOY	SAL_water	SAL_cloud	HMT_water	HMT_cloud	HYR_water	HYR_cloud	HYB_water	HYB_cloud	HYE_water	HYE_cloud	ATA_water	ATA_cloud	ONT_water	ONT_cloud	CAM_water	CAM_cloud	PET_water	PET_cloud	HYC_water	HYC_cloud	HTU_water	HTU_cloud	BLA_water	BLA_cloud	HYG_water	HYG_cloud	HYN_water	HYN_cloud	HYA_water	HAY_cloud	HRE_water	HRE_cloud	HOR_water	HOR_cloud	CVI_water	CVI_cloud	CVI2_water	CVI2_cloud	SLD_water	SLD_cloud
1984-03-19	1984	79	0	547	0	105	0	102	0	16	0	7	0	93	0	583	0	220	0	2582	0	154	0	5	0	51	0	755	0	353	0	68	0	319	0	188	0	234	0	44	0	250
1984-05-16	1984	137	0	547	0	94	0	102	0	16	0	7	0	93	0	583	0	163	0	2582	0	154	0	5	0	51	0	755	0	353	0	68	0	319	0	188	0	234	0	44	0	250
1984-06-01	1984	153	230	0	0	0	39	0	0	0	0	0	58	0	343	0	0	0	1212	0	0	0	0	0	5	0	3	0	0	0	0	0	0	0	0	0	0	0	0	0	123	0
1984-06-17	1984	169	0	547	0	0	6	0	0	0	0	0	8	0	0	583	0	0	775	0	0	0	0	0	0	0	0	0	0	0	0	68	0	0	0	0	0	234	0	0	50	0
1984-07-03	1984	185	0	407	0	0	0	0	0	0	0	0	0	0	258	82	0	0	70	581	0	0	0	0	0	0	0	0	0	0	0	0	0	0	0	0	0	0	0	0	10	68
1984-07-19	1984	201	22	0	0	0	0	0	0	0	0	0	0	0	175	0	0	0	94	0	0	0	0	0	0	0	0	0	0	0	0	0	0	0	0	0	0	0	0	0	10	0
1984-08-04	1984	217	6	0	0	0	0	0	0	0	0	0	0	0	273	0	0	0	109	0	0	0	0	0	0	0	0	0	0	0	0	0	0	0	0	0	0	0	0	0	11	0
1984-08-20	1984	233	171	0	0	0	59	0	0	0	0	0	36	0	271	0	0	0	100	0	0	0	0	0	0	0	0	0	0	0	0	0	0	0	0	0	0	0	0	0	137	0
1984-09-05	1984	249	23	0	0	0	7	0	0	0	0	0	14	0	256	0	0	0	116	0	0	0	0	0	6	0	0	0	0	0	0	0	0	0	0	0	0	0	0	0	49	0
1984-09-21	1984	265	0	547	76	0	51	0	0	0	0	0	58	0	341	0	0	188	0	2582	14	108	0	0	26	0	273	90	123	176	0	68	0	314	0	188	0	224	0	44	3	152
1984-10-07	1984	281	189	0	88	0	48	0	0	0	0	0	57	0	335	0	0	0	1159	0	104	0	0	0	22	0	305	0	174	0	0	0	0	0	0	0	0	0	0	0	132	0
1984-10-23	1984	297	170	0	85	0	36	0	0	0	0	0	47	0	324	0	0	0	1058	0	104	0	0	0	13	0	277	0	157	0	0	0	0	0	0	0	0	0	0	0	138	0
1984-11-08	1984	313	0	547	0	105	0	102	0	16	0	7	0	93	0	583	0	220	0	2582	0	154	0	5	0	51	0	755	0	353	0	68	0	319	0	188	0	234	0	44	0	250
1984-11-24	1984	329	0	468	87	0	58	0	0	0	0	0	62	0	0	580	3	0	19	2509	82	57	0	0	30	0	384	0	121	29	0	47	0	166	0	188	0	234	0	1	114	10
1985-01-27	1985	27	150	237	83	0	61	0	0	0	0	0	69	0	229	154	0	0	371	1921	134	0	0	0	36	0	397	0	78	42	3	0	0	0	0	11	0	0	0	0	117	4
1985-02-12	1985	43	0	547	0	105	0	102	0	16	0	7	0	93	0	547	0	220	9	2553	0	154	0	5	0	51	0	755	0	353	0	68	0	112	0	137	0	142	0	0	0	250
1985-03-16	1985	75	172	154	75	0	61	0	2	0	0	0	68	0	368	0	0	0	1242	497	116	0	0	0	32	0	340	0	51	0	0	0	0	0	1	0	0	0	0	0	119	0
1985-06-20	1985	171	230	0	42	0	9	0	0	0	0	0	8	0	353	0	0	0	406	0	87	0	0	0	12	0	85	0	0	0	0	0	0	0	0	0	0	0	0	0	38	0
1985-07-06	1985	187	0	546	0	0	0	102	0	16	0	7	0	93	0	583	0	0	0	2573	1	0	0	0	0	51	0	0	0	0	0	0	0	0	0	12	0	0	0	0	0	250
1985-07-22	1985	203	67	0	0	0	0	0	0	0	0	0	0	0	314	0	0	0	233	0	53	0	0	0	0	0	0	0	0	0	0	0	0	0	0	0	0	0	0	0	13	0
1985-08-07	1985	219	10	0	0	0	0	0	0	0	0	0	0	0	316	0	0	0	127	0	6	0	0	0	0	0	0	0	0	0	0	0	0	0	0	0	0	0	0	0	3	0
1985-08-23	1985	235	0	383	0	0	0	0	0	0	0	0	0	0	251	156	0	0	94	0	0	0	0	0	0	0	0	0	0	0	0	0	0	0	0	0	0	0	0	0	4	0
1985-09-08	1985	251	0	547	0	105	0	0	0	0	0	0	0	0	0	583	0	220	0	2582	0	154	0	0	0	0	0	755	0	353	0	64	0	319	0	188	0	234	0	5	9	0
1985-09-24	1985	267	16	0	0	0	25	0	0	0	0	0	34	0	78	344	0	0	225	0	0	0	0	0	17	0	0	0	0	0	0	0	0	0	0	0	0	0	0	0	81	0
1985-10-10	1985	283	0	393	0	0	9	0	0	0	0	0	11	65	0	583	0	0	22	528	0	0	0	0	4	0	0	0	0	30	0	0	0	0	0	0	0	232	0	17	0	226
1985-11-11	1985	315	0	495	0	105	0	102	0	16	0	7	0	93	0	583	0	0	0	2582	0	147	0	5	0	51	0	727	0	32	0	68	0	319	0	188	0	234	0	44	0	250
1985-11-27	1985	331	0	547	0	105	0	102	0	16	0	7	0	93	0	583	0	220	0	2582	0	154	0	5	0	51	0	755	0	353	0	68	0	319	0	188	0	234	0	44	0	250
1986-01-14	1986	14	8	452	0	0	43	0	0	0	0	0	59	0	26	476	0	0	262	2215	0	145	0	0	18	0	34	0	0	42	0	0	0	80	0	14	0	73	0	0	16	180
1986-01-30	1986	30	0	547	0	105	0	102	0	16	0	7	0	93	0	583	0	220	0	2582	0	154	0	5	0	51	0	755	0	353	0	68	0	319	0	188	0	234	0	44	0	250
1986-02-15	1986	46	0	547	0	105	0	102	0	16	0	7	0	93	0	583	0	220	0	2582	0	154	0	5	0	51	0	755	0	353	0	68	0	319	0	188	0	234	0	44	0	250
1986-03-03	1986	62	100	295	0	0	8	81	0	16	0	7	0	93	254	98	0	0	0	2582	0	131	0	5	18	0	0	206	0	0	0	0	0	319	0	188	0	234	0	44	8	189
1986-04-04	1986	94	213	0	0	18	0	101	0	13	0	7	0	93	0	513	0	157	293	1418	0	20	0	0	2	0	0	276	0	260	0	68	0	0	0	0	0	0	0	0	34	121
1986-04-20	1986	110	206	0	0	0	36	0	0	0	0	0	67	0	216	113	0	0	33	2240	0	0	0	0	3	0	0	0	0	0	0	3	0	96	0	8	0	214	0	44	98	0
1986-05-06	1986	126	0	547	0	105	0	102	0	0	0	7	0	93	48	433	0	166	57	2472	0	154	0	5	0	51	0	740	0	352	0	68	0	233	0	0	0	234	0	44	0	250
1986-06-07	1986	158	0	547	0	105	0	102	0	16	0	7	0	93	0	583	0	220	0	2582	0	154	0	5	0	51	0	755	0	353	0	68	0	319	0	188	0	234	0	44	0	250
1986-06-23	1986	174	107	0	0	0	45	0	0	0	0	0	58	0	288	0	0	0	490	0	0	0	0	0	13	0	0	0	0	0	0	0	0	0	0	0	0	0	0	0	61	0
1986-07-25	1986	206	0	547	0	105	0	102	0	16	0	7	0	93	0	583	0	220	0	2582	0	154	0	5	0	51	0	755	0	353	0	68	0	319	0	188	0	234	0	44	0	250
1986-08-10	1986	222	224	0	59	0	63	0	12	0	4	0	71	0	328	0	133	0	1496	197	121	0	2	0	36	0	537	0	201	0	28	0	0	0	145	0	119	0	26	0	198	0
1986-08-26	1986	238	210	0	45	0	66	0	9	0	0	0	70	0	296	60	91	0	1081	531	121	0	2	0	36	0	431	0	153	0	13	0	0	0	103	0	0	0	10	0	205	0
1986-09-27	1986	270	0	547	0	105	60	0	5	0	0	0	12	62	301	0	0	220	126	2368	0	154	0	0	28	0	0	742	0	256	0	10	0	222	0	42	0	85	0	43	183	0
1986-10-13	1986	286	222	0	0	78	63	0	8	0	0	0	69	0	102	422	5	162	1749	0	109	0	0	0	33	0	450	0	104	0	26	0	106	0	96	57	37	0	25	0	204	0
1986-10-29	1986	302	228	0	27	0	59	0	7	0	0	0	71	0	202	315	41	0	1502	347	109	0	0	0	26	0	516	0	112	0	35	0	166	0	149	0	145	0	33	0	196	11
1986-11-14	1986	318	0	547	0	105	0	102	0	16	0	7	0	93	0	583	0	220	0	2582	0	154	0	5	0	51	0	755	0	353	0	68	0	319	0	188	0	234	0	44	0	250
1986-11-30	1986	334	0	547	0	105	0	102	0	16	0	7	0	93	0	583	0	220	0	2582	0	154	0	5	0	51	0	755	0	353	0	68	0	319	0	188	0	234	0	44	0	250
1986-12-16	1986	350	0	547	0	105	0	102	0	16	0	7	0	93	33	531	0	220	0	2582	0	154	0	5	0	51	0	755	0	353	0	68	0	319	0	188	0	234	0	44	0	250
1987-01-17	1987	17	240	0	20	0	69	0	13	0	0	0	71	0	538	0	0	0	908	1041	126	0	2	0	36	0	506	0	123	0	30	0	154	0	157	0	143	0	32	0	209	0
1987-02-02	1987	33	0	547	0	105	0	102	0	16	0	7	0	93	0	583	0	220	0	2582	0	154	0	5	0	51	0	755	0	353	0	68	0	319	0	188	0	234	0	44	0	250
1987-02-18	1987	49	0	547	0	105	0	102	0	16	0	7	0	93	0	583	0	220	0	2582	0	154	0	5	0	51	0	755	0	353	0	68	0	319	0	188	0	234	0	44	0	250
1987-04-23	1987	113	222	0	0	0	1	0	0	0	0	0	41	0	0	583	0	0	0	2578	0	131	0	0	0	49	216	0	0	0	0	0	0	319	0	188	0	234	0	44	30	165
1987-05-09	1987	129	244	0	0	0	57	0	8	0	0	0	69	0	529	0	0	0	1714	0	97	0	0	0	31	0	265	0	0	0	0	0	0	0	98	0	0	0	0	0	199	0
1987-05-25	1987	145	146	137	0	0	57	0	9	0	0	0	67	0	0	583	0	0	1641	0	86	0	0	0	30	0	214	0	0	0	20	0	0	0	73	0	0	0	0	0	190	0
1987-06-10	1987	161	0	547	0	105	0	102	0	16	0	7	0	93	8	560	0	220	0	2582	0	154	0	5	0	51	0	755	0	353	0	68	0	319	0	188	0	234	0	44	0	250
1987-06-26	1987	177	178	0	0	0	22	0	2	0	0	0	26	0	471	0	0	0	927	0	59	0	0	0	25	0	72	0	0	0	0	0	0	0	0	0	0	0	0	0	151	0
1987-07-12	1987	193	131	102	0	0	15	70	8	0	0	0	0	93	0	583	0	0	1187	186	48	0	0	3	5	0	12	90	0	0	0	0	0	0	0	36	0	0	0	0	83	49
1987-08-13	1987	225	0	172	0	0	0	0	0	0	0	0	8	0	83	166	0	0	122	989	0	0	0	0	0	0	0	0	0	0	0	0	0	0	0	0	0	0	0	0	13	219
1987-10-16	1987	289	0	547	0	105	0	102	0	16	0	7	0	93	0	583	0	220	0	2582	0	154	0	5	0	51	0	755	0	353	0	68	0	319	0	188	0	234	0	44	0	250
1987-11-01	1987	305	141	149	30	0	6	90	0	16	0	0	58	9	0	583	0	0	167	2278	16	79	0	5	0	51	0	111	0	39	0	51	45	171	0	182	84	150	10	30	0	250
1987-11-17	1987	321	156	203	45	0	63	0	3	0	4	0	24	57	0	583	2	28	1492	374	44	37	3	0	38	0	103	0	0	42	36	0	157	47	109	71	188	46	43	0	181	0
1988-01-20	1988	20	0	547	0	105	0	102	0	16	0	7	0	93	0	583	0	220	0	2582	0	154	0	5	0	51	0	755	0	353	0	68	0	319	0	188	0	234	0	44	0	250
1988-04-09	1988	100	95	262	0	100	0	102	0	16	0	7	0	93	40	479	0	0	1022	872	73	0	0	5	0	49	4	310	0	21	19	0	10	249	154	0	0	234	36	0	0	250
1988-04-25	1988	116	0	547	0	105	0	102	0	16	0	7	0	93	0	583	0	220	0	2582	0	154	0	5	0	51	0	755	0	353	0	68	0	319	0	188	0	234	0	44	0	250
1988-05-27	1988	148	317	0	16	0	65	0	8	0	3	0	72	0	409	0	1	0	1742	5	0	150	0	0	31	0	86	0	0	51	3	0	143	0	139	0	217	0	35	0	168	0
1988-06-28	1988	180	0	547	32	18	61	0	5	0	0	0	0	82	0	583	0	220	0	2582	0	150	0	0	33	0	42	703	2	316	0	68	0	319	0	188	0	234	0	44	63	139
1988-07-14	1988	196	293	0	5	0	63	0	1	0	0	0	70	0	418	0	67	0	1705	1	27	0	0	0	29	0	57	0	0	0	0	0	142	0	115	0	175	0	30	0	125	0
1988-07-30	1988	212	0	547	0	105	0	102	0	16	0	7	0	93	0	583	0	220	0	2582	0	154	0	5	0	51	0	755	0	353	0	68	0	319	0	188	0	234	0	44	0	250
1988-08-31	1988	244	274	0	0	0	2	0	0	0	0	0	58	0	351	0	0	0	1677	0	0	0	0	0	10	0	0	0	0	0	0	0	0	0	58	0	136	0	0	0	69	0
1989-01-22	1989	22	221	108	6	0	58	0	0	0	0	0	34	41	0	571	22	0	435	1901	10	0	0	0	31	0	91	0	3	31	0	44	66	145	4	174	13	200	0	0	15	206
1989-03-27	1989	86	0	547	0	105	0	102	0	16	0	7	0	93	0	583	0	220	0	2582	0	154	0	5	0	51	0	755	0	353	0	68	0	319	0	188	0	234	0	44	0	250
1989-04-12	1989	102	0	547	0	105	0	102	0	16	0	7	0	93	0	583	0	220	0	2582	0	154	0	5	0	51	0	755	0	353	0	68	0	319	0	188	0	234	0	44	0	250
1989-05-14	1989	134	0	547	0	8	17	72	0	16	0	0	0	93	7	556	0	0	1522	464	0	154	0	5	0	51	16	63	0	297	0	68	0	319	0	188	0	234	0	0	0	250
1989-06-15	1989	166	0	547	0	0	17	30	0	0	0	0	11	0	0	583	0	220	0	2578	0	154	0	0	0	51	0	700	0	278	0	68	0	245	0	188	0	234	0	0	4	240
1989-07-01	1989	182	89	318	0	0	5	83	0	0	0	0	10	75	0	576	0	0	27	2474	0	0	0	0	23	0	0	0	0	0	0	0	1	82	0	0	58	104	0	0	0	250
1989-07-17	1989	198	286	0	0	0	42	0	0	0	0	0	69	0	368	0	0	0	1692	0	0	0	0	0	23	0	0	0	0	0	0	0	0	0	0	0	112	0	0	0	89	0
1989-08-02	1989	214	168	181	0	1	21	0	0	0	0	0	40	0	60	380	0	0	1068	671	0	0	0	0	0	0	0	0	0	10	0	0	0	0	0	0	1	159	0	0	73	0
1989-09-03	1989	246	0	547	0	105	0	102	0	16	0	7	0	93	0	583	0	219	0	2582	0	154	0	5	0	51	0	755	0	353	0	68	4	24	0	71	0	234	0	44	0	250
1989-10-05	1989	278	0	547	0	105	0	102	0	16	0	7	0	93	0	583	0	202	373	2074	0	154	0	5	0	51	0	755	0	353	8	42	19	155	16	123	0	216	1	0	0	250
1989-10-21	1989	294	274	0	30	0	61	0	14	0	0	0	64	0	428	0	21	0	1506	276	104	0	0	0	32	0	490	0	4	0	5	0	12	0	98	0	76	0	0	0	190	0
1989-11-06	1989	310	176	141	15	0	22	43	0	0	0	0	46	0	137	386	0	174	0	2553	0	148	0	0	0	49	84	417	1	0	0	51	0	319	0	162	0	231	0	0	0	250
1989-12-08	1989	342	0	547	0	105	0	102	0	16	0	7	0	93	0	583	0	220	0	2582	0	154	0	5	0	51	0	755	0	353	0	68	0	319	0	188	0	234	0	44	0	250
1990-01-09	1990	9	0	547	0	105	0	102	0	16	0	7	0	93	2	581	0	220	0	2582	0	154	0	5	0	51	0	755	0	353	0	68	0	319	0	188	0	234	0	44	0	250
1990-01-25	1990	25	0	547	0	105	0	102	0	16	0	7	0	93	0	583	0	220	0	2582	0	154	0	5	0	51	0	755	0	353	0	68	0	319	0	188	0	234	0	44	0	250
1990-02-10	1990	41	169	235	60	0	62	0	16	0	4	0	73	0	300	282	1	187	495	1949	81	60	0	0	19	27	270	311	107	0	34	0	132	0	47	138	51	117	34	0	14	233
1990-02-26	1990	57	45	439	49	0	58	0	14	0	1	0	69	0	557	22	40	89	7	2492	13	119	0	0	32	0	423	133	90	0	26	0	131	0	128	0	0	223	30	0	47	177
1990-03-14	1990	73	0	547	0	105	0	102	0	16	0	7	0	93	0	392	0	220	0	2582	0	154	0	5	0	51	0	755	0	353	0	68	0	319	0	188	0	234	0	44	0	250
1990-03-30	1990	89	0	547	0	105	0	102	0	16	0	7	0	93	0	583	0	220	0	2582	0	154	0	5	0	51	0	755	0	353	0	68	0	319	0	188	0	234	0	44	0	250
1990-04-15	1990	105	374	0	53	0	64	0	16	0	5	0	79	0	582	0	84	0	618	1576	117	0	0	0	36	0	504	0	80	0	30	0	138	0	137	0	136	0	29	0	202	0
1990-05-01	1990	121	0	547	0	105	0	102	0	16	0	7	0	93	0	583	0	220	0	2582	0	154	0	5	0	51	0	755	0	353	0	68	0	319	0	188	0	234	0	44	0	250
1990-05-17	1990	137	326	0	42	0	61	0	16	0	1	0	72	0	575	0	80	0	1890	0	94	0	0	0	34	0	415	0	13	0	10	0	113	0	100	0	128	0	25	0	198	0
1990-06-02	1990	153	258	0	24	0	19	0	0	16	0	1	0	93	0	583	65	0	1797	0	77	0	0	5	18	0	350	0	0	0	0	0	1	236	49	0	0	234	0	44	152	0
1990-06-18	1990	169	294	0	24	0	63	0	4	0	0	0	70	0	526	0	65	0	1877	0	87	0	0	0	33	0	291	0	0	0	0	0	94	0	84	0	105	0	7	0	195	0
1990-08-21	1990	233	265	0	0	0	0	102	0	0	0	0	66	0	350	98	0	0	1315	492	50	0	0	0	0	51	15	0	0	0	0	0	0	0	0	0	0	0	0	0	0	250
1990-09-06	1990	249	157	192	0	0	68	0	0	0	0	0	71	0	363	0	0	0	870	1136	46	0	0	0	30	0	118	0	0	0	0	0	0	0	0	0	0	0	0	0	193	0
1990-09-22	1990	265	181	154	0	0	66	0	0	0	0	0	70	0	343	33	4	0	509	1713	25	0	0	0	31	0	99	0	0	0	0	0	0	0	0	0	0	0	0	0	101	112
1990-12-11	1990	345	0	547	0	105	0	102	0	16	0	7	0	93	0	583	0	220	0	2582	0	154	0	5	0	51	0	755	0	353	0	68	0	319	0	188	0	234	0	44	0	250
1991-01-12	1991	12	0	547	0	105	0	102	0	16	0	7	0	93	0	583	0	220	0	2582	0	154	0	5	0	51	0	755	0	353	0	68	0	319	0	188	0	234	0	44	0	250
1991-01-28	1991	28	322	0	34	0	70	0	4	0	0	0	73	0	226	284	14	130	886	1437	23	93	0	0	33	0	119	231	98	31	0	0	56	0	4	162	13	0	0	0	192	15
1991-02-13	1991	44	324	0	0	86	32	42	0	16	0	0	6	87	0	583	0	175	417	1969	5	129	0	0	34	0	0	732	0	227	0	0	0	319	0	125	0	229	0	44	113	86
1991-03-01	1991	60	0	547	0	105	0	102	0	16	0	7	0	93	0	583	0	220	0	2582	0	154	0	5	0	51	0	755	0	353	0	68	0	319	0	188	0	234	0	44	0	250
1991-03-17	1991	76	0	547	0	105	0	102	0	16	0	7	0	93	0	583	0	220	0	2582	0	154	0	5	0	51	0	755	0	353	0	68	0	319	0	188	0	234	0	44	0	250
1991-04-02	1991	92	231	137	46	0	66	0	4	0	0	0	71	0	118	353	28	110	879	1267	64	40	0	0	32	0	118	266	122	0	0	0	100	0	84	0	72	0	10	0	180	20
1991-04-18	1991	108	0	547	0	105	0	102	0	16	0	7	0	93	0	583	0	220	0	2582	0	154	0	5	0	51	0	755	0	353	0	68	0	319	0	188	0	234	0	44	0	250
1991-05-04	1991	124	363	0	32	0	67	0	5	0	0	0	75	0	393	0	88	0	1870	0	91	0	0	0	34	0	253	0	76	0	0	0	66	0	26	0	0	0	0	0	201	0
1991-05-20	1991	140	0	547	0	105	35	0	0	0	0	0	32	0	0	583	0	220	0	2582	0	154	0	0	31	0	0	755	0	353	0	68	0	319	0	188	0	234	0	44	196	0
1991-06-05	1991	156	0	547	0	74	8	86	5	0	0	0	0	91	6	563	0	220	7	2530	0	154	0	5	0	51	0	356	0	353	0	68	0	64	0	187	12	107	0	0	0	250
1991-06-21	1991	172	290	0	0	0	71	0	2	0	0	0	69	0	223	170	0	0	1045	880	66	0	0	0	33	0	95	0	0	0	0	0	0	0	0	0	0	0	0	0	188	0
1991-07-07	1991	188	282	0	0	0	67	0	0	0	0	0	68	0	308	0	0	0	1677	110	29	0	0	0	33	0	70	0	0	0	0	0	0	0	0	0	0	0	0	0	203	0
1991-07-23	1991	204	247	82	0	0	61	0	0	0	0	0	71	0	14	454	0	0	85	2266	0	0	0	0	21	0	4	0	0	0	0	0	0	0	0	0	0	0	0	0	48	174
1991-08-08	1991	220	0	547	0	42	0	102	0	16	0	7	0	93	0	583	0	220	0	2582	0	147	0	0	0	51	0	368	0	59	0	68	0	319	0	188	0	234	0	44	0	250
1991-08-24	1991	236	212	116	0	0	28	0	0	0	0	0	70	0	0	557	0	0	302	1919	0	0	0	0	0	0	0	0	0	0	0	0	0	0	0	0	0	0	0	0	171	0
1991-09-25	1991	268	0	547	0	76	0	102	0	16	0	7	0	93	0	583	0	214	0	2582	10	104	0	5	0	51	129	103	11	224	0	68	0	319	0	188	0	163	0	0	0	250
1991-10-11	1991	284	3	512	0	66	73	0	1	3	0	7	28	51	87	233	0	160	142	2145	0	154	0	0	31	0	2	393	1	316	0	0	0	307	0	179	0	8	0	44	26	217
1991-10-27	1991	300	0	547	0	54	70	0	2	0	0	0	79	0	0	555	0	220	13	2521	15	82	0	0	29	0	0	588	0	293	0	68	0	33	0	31	0	220	0	0	22	211
1991-11-12	1991	316	0	547	0	105	32	39	0	0	0	0	0	93	0	583	0	220	0	2582	0	154	0	0	14	29	0	755	0	353	0	68	0	319	0	188	0	234	0	44	13	227
1991-11-28	1991	332	0	547	0	105	0	102	0	16	0	7	0	93	0	583	0	220	0	2582	0	154	0	5	0	51	0	755	0	353	0	68	0	319	0	188	0	234	0	44	0	250
1991-12-14	1991	348	0	547	0	105	0	102	0	16	0	7	0	93	0	583	0	220	0	2582	0	154	0	5	0	51	0	755	0	353	0	68	0	319	0	188	0	234	0	44	0	250
1992-01-15	1992	15	0	547	0	102	0	102	0	16	0	0	0	93	0	583	0	219	0	2582	0	133	0	5	0	51	0	534	0	279	0	68	0	319	0	188	0	234	0	44	0	250
1992-01-31	1992	31	0	547	0	105	0	102	0	16	0	7	0	93	0	514	0	220	0	2582	0	154	0	5	0	51	0	755	0	353	0	68	0	319	0	16	0	0	0	0	0	250
1992-02-16	1992	47	0	547	0	105	0	102	0	0	0	0	0	93	0	561	0	220	0	2582	0	154	0	5	0	51	0	755	0	353	0	68	0	319	0	188	0	234	0	44	0	250
1992-03-19	1992	79	0	444	0	105	0	102	0	16	0	7	0	93	0	77	0	220	115	837	0	154	0	5	0	51	0	755	0	353	0	2	0	319	0	0	99	131	0	44	0	250
1992-04-04	1992	95	0	547	0	105	0	102	0	16	0	7	0	93	0	583	0	220	0	2582	0	154	0	5	0	51	0	755	0	353	0	68	0	319	0	188	0	234	0	44	0	250
1992-04-20	1992	111	299	0	0	0	74	0	3	0	0	0	72	0	239	99	3	0	1124	695	8	0	0	0	4	42	105	0	0	0	0	0	0	0	0	0	0	0	0	0	48	132
1992-05-06	1992	127	0	547	0	105	0	102	0	16	0	7	0	93	0	583	0	220	9	2551	0	154	0	5	0	51	2	505	0	353	0	65	0	0	0	188	0	0	0	0	0	250
1992-05-22	1992	143	0	547	0	53	5	97	1	12	0	7	0	93	0	577	0	160	1249	571	0	133	0	0	0	51	55	592	6	54	0	68	0	217	0	157	0	0	0	44	73	142
1992-06-07	1992	159	1	542	0	105	0	102	0	16	0	7	0	93	1	572	0	220	59	2214	0	154	0	5	0	51	0	755	0	353	0	18	1	17	0	164	0	234	0	44	0	250
1992-06-23	1992	175	0	547	0	105	25	77	0	16	0	7	0	93	0	583	0	220	0	2582	0	154	0	5	0	51	0	755	0	353	0	68	0	319	0	188	0	234	0	44	0	250
1992-07-09	1992	191	0	547	0	0	34	41	5	0	0	0	71	0	0	565	9	0	52	2212	0	0	0	5	30	0	14	101	0	0	15	0	0	0	0	0	0	0	0	0	0	250
1992-07-25	1992	207	0	544	0	40	62	0	0	0	0	0	53	0	6	498	0	124	35	2148	0	154	0	5	15	0	0	553	0	353	0	49	0	0	0	155	0	80	0	0	6	186
1992-08-10	1992	223	95	303	0	0	59	0	0	0	0	0	69	0	197	92	0	0	664	1177	0	0	0	0	26	0	0	0	0	0	0	0	0	0	0	0	0	0	0	0	64	118
1992-09-11	1992	255	0	547	0	0	23	0	0	0	0	0	3	0	0	582	0	0	47	1840	0	0	0	0	4	0	0	0	0	45	0	0	0	0	0	0	0	0	0	0	94	0
1992-09-27	1992	271	0	547	0	105	0	102	0	16	0	7	0	93	0	583	0	220	0	2582	0	154	0	5	0	51	0	755	0	353	0	68	0	319	0	188	0	234	0	44	0	250
1992-10-13	1992	287	0	547	0	105	0	102	0	16	0	7	0	93	0	583	0	220	0	2582	0	154	0	5	0	51	0	755	0	353	0	68	0	319	0	188	0	234	0	44	0	250
1992-10-29	1992	303	0	547	0	105	0	102	0	16	0	7	0	93	0	583	0	220	0	2582	0	154	0	5	0	51	0	755	0	353	0	68	0	319	0	188	0	234	0	44	0	250
1992-11-14	1992	319	0	547	0	105	0	91	0	2	0	1	0	93	0	558	0	220	0	2582	0	154	0	5	0	51	0	652	0	353	0	0	0	319	0	188	0	234	0	44	0	250
1992-11-30	1992	335	10	484	0	0	51	0	0	0	0	0	39	38	0	498	0	0	157	1676	0	0	0	0	20	0	0	74	0	0	0	0	0	0	0	0	0	0	0	0	22	138
1992-12-16	1992	351	0	547	0	105	0	102	0	16	0	7	0	93	0	583	0	220	0	2582	0	154	0	5	0	51	0	755	0	353	0	68	0	319	0	188	0	234	0	44	0	250
1993-01-01	1993	1	0	537	0	0	1	67	0	0	0	0	0	91	0	573	0	143	0	2536	0	102	0	0	0	51	0	333	0	8	0	0	0	270	0	156	0	154	0	0	0	250
1993-01-17	1993	17	0	547	0	105	0	102	0	16	0	7	0	93	0	583	0	220	0	2582	0	154	0	5	0	51	0	755	0	353	0	68	0	319	0	188	0	234	0	44	0	250
1993-02-18	1993	49	307	0	51	0	62	0	0	0	0	0	70	0	0	446	35	95	1305	728	83	0	0	0	32	0	94	74	126	0	37	0	0	0	22	82	42	60	0	0	41	173
1993-04-07	1993	97	331	0	39	0	70	0	1	0	0	0	67	0	276	0	66	0	1366	516	80	0	0	0	32	0	129	0	117	0	27	0	0	0	0	0	0	0	0	0	156	0
1993-04-23	1993	113	334	0	29	0	66	0	1	0	0	0	65	0	281	0	57	0	1735	0	68	0	0	0	31	0	103	0	81	0	20	0	0	0	0	0	0	0	0	0	182	0
1993-06-10	1993	161	0	547	0	105	57	0	0	0	0	0	59	0	2	424	0	220	458	1608	0	154	0	0	0	51	0	755	0	353	0	0	0	319	0	188	0	204	0	0	113	0
1993-06-26	1993	177	196	56	0	0	0	102	0	0	0	0	7	64	0	574	0	169	101	2418	47	0	0	0	0	51	41	0	0	0	0	0	0	0	0	0	0	0	0	0	3	243
1993-07-12	1993	193	0	547	0	105	0	102	0	16	0	7	0	93	0	583	0	220	0	2582	0	154	0	5	0	51	0	755	0	353	0	68	0	319	0	188	0	234	0	44	0	250
1993-07-28	1993	209	220	126	0	0	0	102	0	16	0	0	0	93	1	564	0	167	0	2531	0	0	0	0	0	51	0	0	0	0	0	0	0	0	0	0	0	0	0	0	0	250
1993-08-13	1993	225	9	497	0	0	0	102	0	16	0	0	0	93	0	563	0	133	0	2576	0	0	0	0	0	51	0	0	0	0	0	0	0	195	0	0	0	0	0	0	0	250
1993-08-29	1993	241	56	410	0	72	0	0	0	0	0	7	5	0	0	543	0	36	65	2005	0	0	0	0	0	0	0	5	0	92	0	7	0	316	0	188	0	234	0	44	39	0
1993-09-14	1993	257	97	326	0	0	18	0	0	0	0	0	49	0	29	218	0	0	367	0	0	0	0	0	2	0	0	0	0	0	0	0	0	0	0	0	0	0	0	0	27	0
1993-09-30	1993	273	0	547	0	69	11	58	0	0	0	0	0	93	0	583	0	220	0	2582	0	154	0	0	0	51	0	268	0	89	0	68	0	312	0	188	0	234	0	44	8	185
1993-10-16	1993	289	0	547	0	105	0	102	0	16	0	7	0	93	0	583	0	220	0	2582	0	154	0	5	0	51	0	755	0	353	0	68	0	319	0	188	0	234	0	44	0	250
1993-11-01	1993	305	0	547	0	105	0	102	0	16	0	7	0	93	0	583	0	220	0	2582	0	154	0	5	0	51	0	755	0	353	0	68	0	319	0	188	0	234	0	44	0	250
1993-11-17	1993	321	0	541	0	87	51	0	0	0	0	0	62	0	187	0	0	220	1356	170	10	0	0	0	26	0	19	229	0	88	0	50	0	0	0	0	0	0	0	0	136	0
1993-12-19	1993	353	0	547	0	59	57	0	0	0	0	0	39	33	0	583	0	220	0	2582	0	154	0	5	27	0	0	755	0	268	0	68	0	319	0	188	0	234	0	44	0	250
1994-01-04	1994	4	0	547	0	105	0	102	0	16	0	7	0	93	0	583	0	220	0	2582	0	154	0	5	0	51	0	755	0	353	0	68	0	319	0	188	0	234	0	44	0	250
1994-01-20	1994	20	0	547	0	105	0	102	0	16	0	7	0	93	0	583	0	220	0	2582	0	154	0	5	0	51	0	755	0	353	0	68	0	319	0	188	0	234	0	44	0	250
1994-02-05	1994	36	0	547	0	105	0	102	0	16	0	7	0	93	0	583	0	220	0	2582	0	154	0	5	0	51	0	755	0	353	0	68	0	319	0	188	0	234	0	44	0	250
1994-02-21	1994	52	286	0	0	0	56	0	0	0	0	0	65	0	94	187	0	0	1390	371	30	0	0	0	29	0	87	0	0	0	0	0	0	0	0	0	0	0	0	0	43	114
1994-03-09	1994	68	286	0	0	0	66	0	0	0	0	0	69	0	190	87	0	0	1426	330	0	0	0	0	29	0	79	0	0	0	0	0	0	0	0	0	0	0	0	0	134	0
1994-03-25	1994	84	246	0	0	0	16	0	0	0	0	0	67	0	18	382	0	0	200	1721	0	0	0	0	21	0	57	0	0	0	0	0	0	0	0	0	0	0	0	0	94	0
1994-04-10	1994	100	0	547	0	73	0	102	0	16	0	7	0	93	0	583	0	220	0	2582	0	154	0	5	0	51	0	755	0	314	0	68	0	319	0	188	0	234	0	44	0	250
1994-06-13	1994	164	276	0	0	0	25	0	0	0	0	0	25	0	125	0	0	0	1032	0	0	0	0	0	17	0	0	0	0	0	0	0	0	0	0	0	0	0	0	0	79	0
1994-06-29	1994	180	177	132	0	0	0	0	0	0	0	0	0	0	79	0	0	0	330	0	0	0	0	0	0	0	0	0	0	0	0	0	0	0	0	0	0	0	0	0	25	0
1994-07-15	1994	196	0	547	0	0	0	102	0	0	0	0	0	93	0	520	0	0	81	1541	0	40	0	0	1	0	0	755	0	0	0	0	0	58	0	185	0	0	0	4	0	250
1994-08-16	1994	228	8	446	0	0	29	0	0	0	0	0	24	0	5	133	0	0	424	0	0	0	0	0	9	0	0	0	0	0	0	0	0	0	0	0	0	0	0	0	72	0
1994-09-17	1994	260	0	547	0	105	0	102	0	16	0	7	0	93	0	583	0	220	197	1424	0	65	0	5	0	51	0	755	0	353	0	66	0	167	0	0	0	19	0	0	0	250
1994-10-03	1994	276	0	546	0	92	0	102	0	16	0	7	0	93	0	249	0	95	0	2582	0	0	0	5	0	51	1	120	0	43	0	68	0	319	0	184	0	234	0	44	0	250
1994-11-04	1994	308	0	547	0	105	0	102	0	16	0	7	0	93	0	583	0	220	0	2582	0	154	0	5	0	51	0	755	0	353	0	68	0	319	0	188	0	234	0	44	0	250
1994-11-20	1994	324	2	503	18	0	60	0	5	0	0	0	62	0	0	537	0	0	122	2270	15	71	0	0	31	0	73	0	0	40	0	0	0	119	0	130	183	0	33	0	1	244
1994-12-06	1994	340	22	474	0	105	21	46	2	0	0	0	32	30	0	579	0	176	0	2582	0	150	0	0	14	27	0	668	0	353	0	0	0	319	0	188	0	234	0	44	0	250
1994-12-22	1994	356	0	547	0	105	0	102	0	16	0	7	0	93	0	583	0	220	0	2369	0	154	0	5	0	51	0	755	0	353	0	68	0	0	0	141	5	194	0	44	0	250
1995-01-23	1995	23	0	547	0	105	0	100	1	0	0	0	0	93	0	566	0	220	0	2582	0	154	0	5	0	46	0	755	0	353	0	68	0	319	0	188	0	234	0	44	0	250
1995-02-08	1995	39	0	547	0	105	0	102	0	16	0	7	0	93	0	552	0	220	0	2582	0	154	0	5	0	51	0	755	0	353	0	68	0	319	0	188	0	234	0	44	0	250
1995-02-24	1995	55	0	547	0	0	3	86	0	16	0	7	33	38	0	583	0	220	1	2508	0	0	0	5	0	51	0	640	0	43	0	0	0	319	0	18	0	234	0	44	0	250
1995-03-12	1995	71	0	547	0	105	0	102	0	16	0	7	0	93	0	583	0	220	0	2582	0	154	0	5	0	51	0	755	0	353	0	68	0	319	0	188	0	234	0	44	0	250
1995-03-28	1995	87	0	547	0	39	0	102	0	16	0	7	0	93	0	583	0	175	0	2580	0	98	0	5	0	51	0	571	0	170	0	25	0	110	0	188	0	214	0	0	0	250
1995-04-29	1995	119	167	121	0	0	40	0	0	0	0	0	52	0	0	547	0	0	447	585	0	31	0	0	15	0	0	0	0	0	0	0	0	7	0	0	10	0	0	0	97	0
1995-05-15	1995	135	271	0	0	0	58	0	0	0	0	0	47	0	4	0	0	0	260	0	0	0	0	0	0	51	0	0	0	0	0	0	0	0	0	0	0	0	0	0	0	250
1995-07-02	1995	183	146	56	0	0	0	0	0	5	0	1	0	0	0	547	0	0	268	213	0	0	0	0	0	51	0	0	0	0	0	39	0	0	0	30	0	42	0	0	8	0
1995-07-18	1995	199	106	0	0	0	0	0	0	0	0	0	0	0	6	18	0	0	23	0	0	0	0	0	0	0	0	0	0	0	0	0	0	0	0	0	0	0	0	0	5	0
1995-08-19	1995	231	0	460	0	0	0	94	0	0	0	0	13	0	3	19	1	0	35	598	0	12	0	5	6	0	0	0	0	294	0	0	0	0	0	0	0	0	0	0	4	124
1995-10-06	1995	279	0	547	0	105	0	102	0	16	0	7	0	93	0	583	0	220	0	2582	0	154	0	5	0	51	0	755	0	353	0	68	0	319	0	188	0	234	0	44	0	250
1995-12-25	1995	359	0	547	0	105	0	102	0	16	0	7	0	93	0	583	0	220	0	2582	0	154	0	5	0	51	0	755	0	353	0	68	0	319	0	188	0	234	0	44	0	250
1996-03-14	1996	74	0	547	0	105	0	102	0	16	0	7	0	93	0	583	0	220	0	2582	0	154	0	5	0	51	0	755	0	330	0	68	0	319	0	188	0	234	0	44	0	250
1996-06-02	1996	154	277	0	3	0	0	102	0	16	0	0	0	93	0	583	0	0	52	1997	0	0	0	5	0	51	2	0	0	0	0	0	0	28	0	0	0	230	0	10	0	250
1996-07-04	1996	186	261	0	0	0	0	0	0	0	0	0	0	0	143	0	0	0	525	0	0	0	0	0	5	0	0	0	0	0	0	0	0	0	0	0	0	0	0	0	36	0
1996-08-05	1996	218	0	540	0	0	0	102	0	0	0	7	42	0	0	374	0	220	0	2582	0	0	0	0	0	51	0	0	0	0	0	29	0	319	0	188	0	234	0	44	0	250
1996-09-22	1996	266	0	523	0	0	0	102	0	0	0	0	0	93	0	583	0	0	15	2459	0	8	0	5	0	45	7	54	0	31	0	0	0	0	0	20	0	0	0	0	0	223
1996-10-08	1996	282	220	0	0	0	50	0	0	0	0	0	39	0	12	0	0	0	604	353	0	0	0	0	9	0	1	0	0	0	0	0	0	0	0	0	0	0	0	0	71	0
1997-03-01	1997	60	261	60	52	0	69	0	3	0	4	0	69	0	90	274	163	0	1521	543	49	49	0	0	37	0	251	156	75	112	9	0	107	45	0	187	144	0	2	0	176	39
1997-04-18	1997	108	0	547	0	105	0	102	0	16	0	7	0	93	0	583	0	220	0	2582	0	154	0	5	0	51	0	755	0	353	0	68	0	319	0	188	0	234	0	44	0	250
1997-07-07	1997	188	216	0	23	0	58	0	0	0	0	0	55	0	176	0	127	0	1678	0	52	0	0	0	22	0	130	0	110	0	17	0	191	0	106	0	173	0	31	0	149	0
1997-07-23	1997	204	0	547	0	105	0	102	0	16	0	7	0	93	0	583	0	220	0	2582	0	154	0	5	0	51	0	755	0	353	0	68	0	319	0	188	0	234	0	44	0	250
1997-08-08	1997	220	0	547	0	105	0	102	0	16	0	7	0	93	0	583	0	220	0	2582	0	154	0	5	0	51	0	755	0	353	0	68	0	319	0	188	0	234	0	44	0	250
1997-09-09	1997	252	211	87	70	0	68	0	0	0	0	0	73	0	61	356	151	0	1424	552	115	0	0	0	29	0	671	0	285	0	14	0	223	0	92	0	137	0	25	0	173	0
1997-11-28	1997	332	5	529	73	25	68	0	0	0	0	0	68	0	0	583	42	177	0	2582	0	154	0	0	19	24	10	745	28	325	0	68	0	319	0	188	0	234	0	44	158	47
1998-01-31	1998	31	0	547	0	105	0	102	0	16	0	7	0	93	0	537	0	220	0	2582	0	154	0	5	0	51	0	755	0	353	0	68	0	319	0	188	0	232	20	10	0	250
1998-05-07	1998	127	501	0	98	0	62	0	4	0	0	0	67	0	249	0	199	0	2343	0	153	0	0	0	35	0	122	633	114	237	46	0	306	0	168	0	201	0	37	0	194	0
1998-05-23	1998	143	523	0	100	0	0	102	0	16	0	7	0	93	7	453	203	0	2448	0	145	0	0	5	0	51	733	0	345	0	43	0	292	0	161	0	206	0	31	0	0	250
1998-06-08	1998	159	1	546	88	0	28	0	0	16	0	0	0	93	0	462	172	0	2514	0	31	94	0	5	32	0	5	750	53	298	43	0	294	0	155	0	151	0	36	0	141	37
1998-06-24	1998	175	493	0	89	0	67	0	0	0	0	0	64	0	224	0	186	0	2450	0	131	0	0	0	32	0	738	0	238	106	40	0	276	0	128	0	133	0	32	0	189	0
1998-07-10	1998	191	465	0	91	0	54	0	0	0	0	0	65	0	226	0	188	0	2413	0	126	0	0	0	28	0	736	0	329	0	33	0	267	0	119	0	115	0	31	0	185	0
1998-07-26	1998	207	448	0	90	0	17	0	0	0	0	0	72	0	43	453	191	0	1772	648	116	0	0	0	28	0	710	0	263	35	28	0	258	0	62	77	115	0	28	0	71	145
1998-08-11	1998	223	428	0	54	39	1	0	0	0	0	0	55	0	83	429	182	0	1932	418	106	0	0	0	30	0	680	0	169	115	21	0	51	225	24	129	63	100	18	0	60	156
1998-08-27	1998	239	329	96	78	0	12	0	0	0	0	0	39	0	165	169	162	0	2013	239	93	0	0	0	17	0	546	102	207	49	11	0	14	297	0	174	107	0	4	0	57	165
1998-09-12	1998	255	0	547	0	105	0	102	0	16	0	7	0	93	0	583	0	220	0	2582	0	154	0	5	0	51	0	755	0	353	0	68	0	319	0	188	0	234	0	44	0	250
1998-10-30	1998	303	0	547	10	66	11	0	0	0	0	0	14	0	131	130	3	210	1803	445	65	0	0	0	1	0	50	639	61	198	1	0	166	0	54	0	75	0	0	0	5	222
1999-04-24	1999	114	303	101	52	0	46	0	0	0	0	0	65	0	255	0	147	0	2361	0	82	0	0	0	28	0	348	121	203	0	3	0	207	0	13	0	141	0	1	0	125	0
1999-06-27	1999	178	257	121	22	0	17	0	0	0	0	0	39	0	223	0	71	0	2141	0	106	0	0	0	27	0	710	0	140	0	0	0	130	0	0	0	54	0	0	0	86	0
1999-07-13	1999	194	0	547	0	105	8	0	0	0	0	0	3	75	0	583	0	220	0	2582	0	154	0	0	0	51	0	755	9	262	0	68	0	319	0	188	31	73	0	44	9	161
1999-07-21	1999	202	282	149	0	0	0	0	0	0	0	0	26	0	0	548	56	0	1988	113	94	0	0	0	15	0	426	278	48	0	0	0	0	0	0	0	0	0	0	0	77	0
1999-07-29	1999	210	242	207	0	0	5	0	0	0	0	0	36	0	94	229	49	0	2035	0	88	0	0	0	29	0	666	0	3	0	0	0	0	0	0	0	9	0	0	0	97	0
1999-08-06	1999	218	338	0	0	10	0	0	0	0	0	0	17	0	205	0	0	187	1779	229	78	0	0	0	10	0	270	298	0	0	0	0	0	0	0	0	0	0	0	0	0	230
1999-08-14	1999	226	342	0	0	1	0	0	0	0	0	0	8	0	2	526	18	0	1237	929	70	0	0	0	4	0	602	0	0	0	0	0	0	0	0	0	0	0	0	0	43	0
1999-08-30	1999	242	323	0	6	0	0	102	0	0	0	0	0	93	0	583	10	0	517	1880	69	0	0	3	11	0	347	314	32	0	0	0	0	0	0	135	0	0	0	0	0	250
1999-09-15	1999	258	0	547	0	105	0	102	0	16	0	7	0	93	63	232	0	220	0	2572	0	154	0	5	0	51	0	755	0	353	0	68	0	242	0	168	0	234	0	0	0	250
1999-10-01	1999	274	328	0	23	0	22	0	0	0	0	0	29	0	198	0	10	0	1269	937	67	0	0	0	11	0	570	0	0	0	0	0	0	0	0	0	0	0	0	0	53	0
1999-10-17	1999	290	0	547	0	105	0	102	0	16	0	7	0	93	0	583	0	220	0	2582	0	154	0	5	0	51	0	755	0	353	0	68	0	319	0	188	0	234	0	44	0	250
1999-10-25	1999	298	267	138	44	0	69	0	0	16	0	6	0	93	190	0	0	190	0	2577	69	0	0	0	29	0	598	0	95	0	0	0	1	261	0	122	12	170	1	0	127	33
1999-11-02	1999	306	0	547	0	105	0	102	0	16	0	7	0	93	0	583	0	220	0	2582	0	154	0	5	0	51	0	755	0	353	0	68	0	319	0	188	0	234	0	44	0	250
1999-11-18	1999	322	180	153	42	0	51	0	0	0	0	0	62	0	0	472	1	157	1314	869	23	69	0	0	22	0	419	203	78	0	0	0	86	38	20	124	62	49	0	0	0	246
1999-12-04	1999	338	0	547	0	105	0	102	0	16	0	7	0	93	0	583	0	220	0	2582	0	154	0	5	0	51	0	755	0	353	0	68	0	319	0	188	0	234	0	44	0	250
1999-12-20	1999	354	179	304	30	26	38	36	0	0	0	0	43	32	42	395	2	145	740	1661	0	132	0	0	28	0	208	450	50	49	0	0	106	9	0	163	89	42	0	0	0	245
2000-01-05	2000	5	253	203	16	69	59	0	0	0	0	0	29	49	52	319	2	184	1283	1053	69	0	0	0	31	0	568	48	116	0	0	0	54	110	22	86	79	85	0	0	0	244
2000-01-13	2000	13	142	330	49	0	58	0	0	0	0	0	69	0	228	0	9	111	1564	611	73	0	0	0	29	0	597	0	114	0	0	0	125	0	2	108	138	0	0	0	139	0
2000-01-29	2000	29	377	0	53	0	61	0	0	0	0	0	70	0	232	0	68	0	1996	0	74	0	0	0	30	0	587	0	118	0	0	0	133	0	85	0	142	0	0	0	145	0
2000-02-14	2000	45	222	235	0	105	0	102	0	16	0	7	0	93	0	583	0	192	1262	1048	0	154	0	5	0	51	80	636	0	353	0	0	27	140	0	143	143	0	0	0	0	250
2000-02-22	2000	53	272	199	48	0	52	0	0	0	0	0	65	0	7	474	0	178	1677	603	2	136	0	0	30	0	262	351	87	0	0	0	58	69	0	154	0	234	0	0	0	249
2000-03-01	2000	61	379	0	43	0	41	0	0	0	0	0	64	0	240	0	61	0	2042	0	73	0	0	0	28	0	548	0	61	0	0	0	79	0	48	0	148	0	0	0	119	0
2000-03-09	2000	69	380	56	41	0	26	0	0	0	0	0	58	0	8	490	0	146	1275	1049	74	0	0	0	32	0	539	0	22	0	0	0	68	0	0	156	133	0	0	0	1	245
2000-03-17	2000	77	381	0	36	0	63	0	0	0	0	0	67	0	237	0	28	0	1994	0	71	0	0	0	30	0	533	0	4	0	0	0	37	0	24	0	140	0	0	0	102	0
2000-03-25	2000	85	388	0	0	100	0	102	0	16	0	7	0	93	1	399	18	0	131	2288	0	153	0	0	0	51	7	703	1	235	0	0	0	91	8	0	8	192	0	0	75	89
2000-04-10	2000	101	0	547	0	105	0	102	0	16	0	7	0	93	0	583	0	220	0	2582	0	154	0	5	0	51	0	755	0	353	0	68	0	319	0	188	0	234	0	44	0	250
2000-04-18	2000	109	0	547	33	0	0	102	0	16	0	7	0	93	0	583	0	220	0	2575	0	154	0	5	0	51	0	755	2	0	0	68	0	319	0	188	0	234	0	44	0	250
2000-04-26	2000	117	0	547	0	105	0	58	0	16	0	7	7	62	0	583	10	48	0	2582	0	154	0	5	0	51	0	740	0	353	0	68	0	319	13	0	0	234	0	44	0	250
2000-05-04	2000	125	0	547	0	105	0	102	0	16	0	7	0	93	0	559	0	220	0	2582	0	154	0	5	0	51	0	755	0	353	0	68	0	319	0	188	0	234	0	44	0	250
2000-05-12	2000	133	289	126	5	61	0	102	0	16	0	7	0	93	0	460	0	165	759	1573	47	51	0	5	0	51	72	608	0	258	0	0	42	0	48	0	116	0	0	0	0	250
2000-05-20	2000	141	380	0	11	0	57	0	0	0	0	0	68	0	223	0	0	0	2018	0	66	0	0	0	25	0	463	0	0	0	0	0	0	0	13	0	117	0	0	0	89	0
2000-05-28	2000	149	140	376	0	9	0	102	0	16	0	0	0	93	0	583	0	220	0	2582	0	154	0	5	0	51	3	750	0	319	0	68	0	319	0	188	0	234	0	44	0	250
2000-06-05	2000	157	0	547	0	105	0	102	0	16	0	7	0	93	214	0	0	220	0	2582	0	154	0	5	0	51	0	755	0	353	0	68	0	319	0	188	0	234	0	44	0	250
2000-06-13	2000	165	348	0	0	0	24	0	0	0	0	0	56	0	220	0	0	0	1581	434	25	0	0	0	28	0	321	0	0	0	0	0	0	0	2	0	98	0	0	0	49	0
2000-06-21	2000	173	350	0	0	0	0	0	0	0	0	0	42	0	221	0	0	0	1921	0	4	0	0	0	6	0	254	0	0	0	0	0	0	0	0	0	65	0	0	0	43	0
2000-06-29	2000	181	341	0	0	0	0	0	0	0	0	0	14	0	213	0	0	0	1523	374	0	0	0	0	0	0	196	0	0	0	0	0	0	0	0	0	25	0	0	0	28	0
2000-07-07	2000	189	318	0	0	0	0	0	0	0	0	0	7	0	196	0	0	0	1659	182	0	0	0	0	0	0	113	0	0	0	0	0	0	0	0	0	0	0	0	0	23	0
2000-07-15	2000	197	191	227	0	0	0	0	0	0	0	0	4	0	208	0	0	0	1452	448	0	0	0	0	0	0	100	0	0	0	0	0	0	0	0	0	0	0	0	0	19	0
2000-07-31	2000	213	145	302	0	0	0	0	0	0	0	0	0	0	58	396	0	0	722	1656	0	0	0	0	0	0	66	0	0	0	0	0	0	0	0	0	0	0	0	0	12	0
2000-08-08	2000	221	343	0	0	0	0	0	0	0	0	0	0	0	212	0	0	0	1807	0	0	0	0	0	0	0	45	0	0	0	0	0	0	0	0	0	0	0	0	0	16	0
2000-08-16	2000	229	85	419	0	0	0	0	0	0	0	0	0	0	1	517	0	0	407	2068	0	0	0	0	0	0	0	0	0	0	0	0	0	0	0	0	0	0	0	0	7	0
2000-09-01	2000	245	177	224	0	0	0	0	0	0	0	0	0	0	0	575	0	0	1059	971	0	0	0	0	0	0	0	0	0	0	0	0	0	0	0	0	0	0	0	0	11	0
2000-09-09	2000	253	179	232	0	0	0	0	0	0	0	0	0	0	137	121	0	0	871	1087	0	0	0	0	0	0	0	0	0	0	0	0	0	0	0	0	0	0	0	0	6	0
2000-09-17	2000	261	71	398	0	0	0	0	0	0	0	0	0	0	100	249	0	0	765	1173	0	0	0	0	0	0	0	0	0	0	0	0	0	0	0	0	0	0	0	0	0	210
2000-09-25	2000	269	268	121	0	0	0	0	0	0	0	0	0	0	0	419	0	0	1410	412	0	0	0	0	0	0	0	0	0	0	0	0	0	0	0	0	0	0	0	0	6	0
2000-10-19	2000	293	79	426	0	84	0	102	0	16	0	0	0	93	45	392	0	195	322	2102	0	0	0	5	0	51	0	47	0	44	0	0	0	0	0	145	0	0	0	0	0	250
2000-10-27	2000	301	320	0	10	0	0	102	0	16	0	7	0	93	61	250	12	0	768	1370	0	154	0	5	0	51	3	364	0	120	2	0	44	132	43	94	49	0	0	0	0	250
2000-11-04	2000	309	232	183	4	0	46	0	0	0	0	0	59	0	101	209	0	118	872	1361	0	0	0	0	18	0	96	47	0	0	0	0	76	0	52	69	17	0	0	0	1	175
2000-11-12	2000	317	0	532	0	105	0	102	0	16	0	7	0	93	0	583	0	178	5	2399	0	154	0	5	0	51	0	551	0	353	0	68	0	306	0	187	0	234	0	44	0	250
2000-11-20	2000	325	0	547	0	105	0	102	0	16	0	7	0	93	0	583	0	220	0	2582	0	154	0	5	0	51	0	755	0	353	0	68	0	319	0	188	0	234	0	44	0	250
2000-12-06	2000	341	0	547	0	105	0	102	0	16	0	7	0	93	0	583	0	220	0	2582	0	154	0	5	0	51	0	755	0	353	0	68	0	319	0	188	0	234	0	44	0	250
2000-12-14	2000	349	0	547	11	0	56	0	0	0	0	0	5	71	0	583	0	136	161	2287	0	0	0	0	20	0	99	59	0	0	0	0	42	35	0	170	3	56	0	0	20	159
2000-12-22	2000	357	0	547	0	105	0	102	0	16	0	7	0	93	0	583	0	220	0	2582	0	154	0	5	0	51	0	755	0	353	0	68	0	319	0	188	0	234	0	44	0	250
2001-01-07	2001	7	0	547	0	105	0	102	0	16	0	7	0	93	0	583	0	220	0	2582	0	154	0	5	0	51	0	755	0	353	0	68	0	319	0	188	0	234	0	44	0	250
2001-01-15	2001	15	329	0	21	0	51	0	0	0	0	0	61	0	211	0	19	0	1809	25	0	0	0	0	19	0	125	0	28	0	0	0	100	0	104	0	60	0	0	0	80	0
2001-01-23	2001	23	0	547	0	105	0	102	0	16	0	7	0	93	0	583	0	220	0	2582	0	154	0	5	0	51	0	755	0	353	0	68	0	319	0	188	0	234	0	44	0	250
2001-01-31	2001	31	0	547	0	105	0	102	0	16	0	7	0	93	0	583	0	220	0	2582	0	154	0	5	0	51	0	755	0	353	0	68	0	319	0	188	0	234	0	44	0	250
2001-02-08	2001	39	0	547	0	105	0	102	0	16	0	7	0	93	0	583	0	220	0	2582	0	154	0	5	0	51	0	755	0	353	0	68	0	319	0	188	0	234	0	44	0	250
2001-02-16	2001	47	0	547	0	105	0	102	0	16	0	7	0	93	0	583	0	220	0	2582	0	154	0	5	0	51	0	755	0	353	0	68	0	319	0	188	0	234	0	44	0	250
2001-02-24	2001	55	0	547	0	105	0	102	0	16	0	7	0	93	0	583	0	220	0	2582	0	154	0	5	0	51	0	755	0	353	0	68	0	319	0	188	0	234	0	44	0	250
2001-03-04	2001	63	0	547	0	105	43	0	0	0	0	0	55	0	0	583	0	182	0	2582	0	154	0	0	19	0	3	166	0	353	0	68	0	319	0	188	0	234	0	44	0	204
2001-03-20	2001	79	8	538	19	0	0	97	0	0	0	0	23	59	0	583	21	0	78	2380	0	0	0	0	0	51	11	279	7	0	0	0	0	319	0	188	0	234	0	44	8	155
2001-03-28	2001	87	0	546	0	87	49	0	0	0	0	0	65	0	0	583	0	220	0	2582	0	154	0	0	5	37	0	692	0	200	0	68	0	319	0	171	0	234	0	44	112	0
2001-04-05	2001	95	2	531	0	16	36	0	0	0	0	0	68	0	0	583	0	219	132	2221	0	68	0	0	21	0	0	467	0	135	0	65	0	312	0	185	0	234	0	44	70	0
2001-04-13	2001	103	347	0	0	0	27	0	0	0	0	0	60	0	210	0	20	0	1841	0	0	0	0	0	10	0	76	0	0	0	0	0	0	0	68	0	65	0	0	0	64	0
2001-04-21	2001	111	334	0	0	0	49	0	0	0	0	0	55	0	216	0	21	0	1763	0	0	0	0	0	16	0	78	0	0	0	0	0	0	0	55	0	11	0	0	0	49	0
2001-05-07	2001	127	0	547	0	96	9	84	0	16	0	7	0	93	0	583	0	114	239	2168	0	154	0	5	0	46	0	703	0	57	0	40	0	211	0	98	0	136	0	0	8	213
2001-05-23	2001	143	315	0	0	63	0	102	0	16	0	7	1	90	135	238	0	92	1650	222	0	89	0	5	0	51	0	440	0	353	0	0	0	0	16	0	60	0	0	0	0	250
2001-06-08	2001	159	334	0	0	0	3	0	0	0	0	0	33	0	213	0	16	0	1761	0	0	0	0	0	8	0	0	0	0	0	0	0	0	0	0	0	4	0	0	0	48	0
2001-06-16	2001	167	0	547	0	0	0	102	0	16	0	7	46	0	0	583	12	0	0	2582	0	154	0	0	0	51	0	569	0	0	0	64	0	260	0	188	0	234	0	32	0	250
2001-06-24	2001	175	94	402	0	0	0	0	0	0	0	0	0	0	0	557	5	0	82	2293	0	0	0	0	0	0	0	0	0	0	0	0	0	0	0	0	0	0	0	0	1	128
2001-07-02	2001	183	22	523	0	0	0	0	0	0	0	0	0	0	86	320	1	0	9	2499	0	0	0	0	0	0	0	0	0	0	0	0	0	0	0	0	0	0	0	0	0	216
2001-07-10	2001	191	172	205	0	0	0	0	0	0	0	0	1	0	189	0	0	0	1582	0	0	0	0	0	0	0	0	0	0	0	0	0	0	0	0	0	0	0	0	0	27	0
2001-07-18	2001	199	67	407	0	0	0	0	0	0	0	0	0	0	144	49	0	0	399	1137	0	0	0	0	0	0	0	0	0	0	0	0	0	0	0	0	0	0	0	0	11	0
2001-07-26	2001	207	310	0	0	0	0	0	0	0	0	0	0	0	12	230	0	0	1181	0	0	0	0	0	0	0	0	0	0	0	0	0	0	0	0	0	0	0	0	0	8	0
2001-08-03	2001	215	6	527	0	0	0	0	0	0	0	0	0	0	6	526	0	0	142	1275	0	0	0	0	0	0	0	0	0	0	0	0	0	0	0	0	0	0	0	0	1	0
2001-08-11	2001	223	71	300	0	0	0	0	0	0	0	0	0	0	46	120	0	0	1011	0	0	0	0	0	0	0	0	0	0	0	0	0	0	0	0	0	0	0	0	0	5	0
2001-08-19	2001	231	34	469	0	0	0	0	0	0	0	0	0	0	0	458	0	0	1286	0	0	0	0	0	0	0	0	0	0	0	0	0	0	0	0	0	0	0	0	0	6	0
2001-08-27	2001	239	49	383	0	0	0	0	0	0	0	0	0	0	115	0	0	0	505	0	0	0	0	0	0	0	0	0	0	0	0	0	0	0	0	0	0	0	0	0	10	0
2001-09-04	2001	247	0	518	0	0	0	102	0	0	0	0	0	93	0	507	0	78	129	1830	0	0	0	0	7	0	0	0	0	0	0	0	0	0	0	0	0	0	0	0	12	181
2001-10-06	2001	279	0	514	4	0	46	0	0	0	0	0	61	0	0	164	9	0	496	1250	31	0	0	0	12	0	1	0	0	0	0	0	0	0	0	0	0	0	0	0	36	114
2001-10-14	2001	287	0	547	0	105	23	45	0	0	0	7	14	49	0	384	0	220	16	2520	0	154	0	0	0	35	0	755	0	353	0	0	11	0	11	162	7	0	30	0	0	242
2001-10-22	2001	295	44	432	9	0	48	0	0	0	0	0	62	0	1	202	16	0	592	1247	28	0	0	0	18	0	5	0	0	0	0	0	0	0	100	0	0	0	25	0	59	55
2001-10-30	2001	303	0	491	6	0	43	0	0	0	0	0	57	0	8	152	15	0	1267	357	10	0	0	0	12	0	0	0	0	0	0	0	0	0	94	0	0	0	19	0	95	0
2001-11-07	2001	311	274	0	0	71	0	102	0	16	0	7	0	93	15	253	0	53	882	887	0	154	0	5	0	51	0	749	0	353	0	59	0	0	104	0	0	0	23	0	0	250
2001-11-15	2001	319	0	547	0	105	0	102	0	16	0	7	0	93	0	583	0	220	0	2582	0	154	0	5	0	51	0	755	0	353	0	68	0	319	0	188	0	234	0	44	0	250
2001-11-23	2001	327	276	0	19	0	59	0	0	0	0	0	66	0	161	0	26	0	1731	1	45	0	0	0	23	0	85	0	5	0	0	0	0	0	110	0	7	0	24	0	120	0
2001-12-01	2001	335	88	331	21	0	50	0	0	0	0	0	61	0	167	0	23	0	1619	139	42	0	0	0	20	0	72	0	6	0	0	0	0	0	97	0	2	0	18	0	99	0
2001-12-09	2001	343	168	148	20	0	62	0	0	0	0	0	63	0	0	583	22	0	1549	63	39	0	0	0	15	0	67	0	2	0	0	0	0	118	0	186	0	234	0	44	188	0
2002-01-10	2002	10	0	547	0	105	0	102	0	16	0	7	0	93	0	582	0	220	0	2581	0	154	0	5	0	51	0	755	0	353	0	68	0	319	0	188	0	234	0	44	0	250
2002-02-03	2002	34	0	547	0	105	0	102	0	16	0	7	0	93	0	583	0	220	0	2582	0	154	0	5	0	51	0	755	0	353	0	46	16	120	41	120	0	205	0	44	0	250
2002-02-11	2002	42	188	121	30	0	60	0	0	0	0	0	65	0	209	0	36	0	1537	241	57	0	0	0	31	0	119	0	56	0	0	0	33	0	110	0	96	0	5	0	130	0
2002-02-19	2002	50	283	13	32	0	68	0	5	0	0	0	72	0	217	0	38	0	1747	0	58	0	0	0	30	0	112	0	16	105	0	0	28	0	106	0	92	0	0	0	142	0
2002-03-15	2002	74	0	547	0	105	0	102	0	16	0	7	0	93	0	583	0	215	0	2571	0	154	0	5	0	51	1	712	0	353	0	68	0	206	0	185	0	234	0	42	0	250
2002-03-23	2002	82	283	0	27	0	61	0	3	0	0	0	72	0	206	0	43	0	1762	0	50	0	0	0	29	0	90	0	28	0	0	0	83	0	102	0	109	0	0	0	130	0
2002-03-31	2002	90	0	546	0	105	0	101	0	16	0	7	0	89	0	583	0	207	11	2480	0	154	0	5	0	51	0	755	0	353	0	68	0	315	0	186	0	234	0	38	11	230
2002-04-16	2002	106	16	465	0	105	0	102	0	16	0	7	9	45	0	0	3	15	109	1162	0	154	0	5	0	51	8	511	0	353	0	8	4	0	0	0	0	109	11	0	0	250
2002-04-24	2002	114	284	0	28	0	65	0	4	0	0	0	69	0	44	290	4	107	1770	0	46	0	0	0	30	0	78	0	14	0	0	0	109	0	95	0	128	0	0	0	154	0
2002-05-26	2002	146	294	0	22	0	67	0	0	0	0	0	72	0	197	0	56	0	1780	0	31	0	0	0	31	0	44	0	0	0	0	0	51	0	86	0	95	0	0	0	140	0
2002-06-19	2002	170	75	424	0	0	0	102	0	16	0	7	0	93	115	0	0	220	462	1651	0	154	0	5	0	51	0	148	0	306	0	0	0	0	41	0	24	0	0	0	0	250
2002-07-29	2002	210	0	547	0	0	0	102	0	0	0	0	18	62	0	567	0	120	0	2577	0	8	0	0	0	51	0	0	0	0	0	0	0	0	0	128	0	0	0	0	0	240
2002-08-14	2002	226	270	0	0	0	0	0	0	0	0	0	15	0	89	194	19	0	1443	0	0	0	0	0	0	0	0	0	0	0	0	0	0	0	0	0	0	0	0	0	22	0
2002-11-02	2002	306	0	547	0	0	52	0	0	0	0	0	59	0	0	583	0	220	0	2582	0	58	0	0	0	51	0	739	0	0	0	68	0	319	0	188	0	234	0	44	0	226
2002-11-18	2002	322	0	547	0	105	0	102	0	16	0	7	0	93	0	583	0	220	0	2582	0	154	0	5	0	51	0	755	0	353	0	68	0	319	0	188	0	234	0	44	0	250
2003-01-21	2003	21	0	547	0	102	10	74	0	0	0	6	35	35	0	479	0	218	0	2534	3	49	1	0	0	50	1	320	10	163	0	68	0	319	0	188	0	234	0	44	0	222
2003-02-06	2003	37	200	121	0	0	63	0	0	0	0	0	62	0	194	0	62	0	1512	170	19	0	1	0	31	0	64	0	85	0	0	0	0	0	53	0	0	0	0	0	136	0
2003-03-10	2003	69	282	0	10	0	61	0	3	0	1	0	66	0	203	0	63	0	1697	0	47	0	1	0	31	0	99	0	101	0	0	0	51	0	70	0	7	0	0	0	133	0
2003-04-27	2003	117	280	0	0	0	61	0	2	0	0	0	67	0	218	0	61	0	1664	0	0	0	0	0	31	0	9	0	6	0	0	0	0	0	16	0	0	0	0	0	129	0
2003-07-08	2003	189	174	120	0	0	0	0	0	0	0	0	15	0	110	165	16	0	1033	0	0	0	0	0	4	0	0	0	0	0	0	0	0	0	0	0	0	0	0	0	41	0
2003-07-24	2003	205	234	0	0	0	0	0	0	0	0	0	1	0	164	0	11	0	270	0	0	0	0	0	0	0	0	0	0	0	0	0	0	0	0	0	0	0	0	0	16	0
2003-08-09	2003	221	151	0	0	0	0	0	0	0	0	0	0	0	0	423	5	0	118	7	0	0	0	0	0	0	0	0	0	0	0	0	0	0	0	0	0	0	0	0	10	0
2003-09-26	2003	269	0	547	0	0	37	0	0	0	0	0	55	0	54	0	0	220	877	444	0	0	0	0	21	0	0	0	63	0	0	15	0	207	0	188	0	152	0	0	84	0
2003-10-12	2003	285	0	447	0	105	0	102	0	16	0	7	0	93	0	583	0	220	0	2582	0	154	0	5	0	51	0	755	0	353	0	68	0	319	0	188	0	234	0	44	0	250
2004-01-16	2004	16	0	547	0	25	0	102	0	16	0	7	0	93	0	583	0	220	0	2582	0	153	0	5	0	51	0	694	0	317	0	68	0	319	0	188	0	234	0	44	0	250
2004-02-01	2004	32	10	535	0	105	0	102	0	16	0	7	0	93	0	583	0	220	0	2582	0	154	0	5	0	51	0	755	0	353	0	68	0	319	0	188	0	234	0	44	0	250
2004-02-17	2004	48	289	0	0	0	64	0	0	0	0	0	63	0	134	0	20	0	1342	337	0	0	0	0	23	0	0	0	20	0	0	0	0	0	0	0	0	0	0	0	84	0
2004-03-04	2004	64	294	0	0	0	55	0	0	0	0	0	66	0	0	436	20	0	441	1983	0	0	0	0	27	0	6	0	54	0	1	0	0	68	0	112	0	0	0	0	79	30
2004-03-20	2004	80	152	217	0	0	55	0	0	0	0	0	63	0	159	0	2	101	1348	487	0	0	0	0	24	0	0	0	39	0	0	0	0	0	0	0	0	0	0	0	52	48
2004-04-05	2004	96	0	547	0	105	0	102	0	16	0	7	0	93	0	583	0	220	0	2582	0	154	0	5	0	51	0	755	0	353	0	68	0	319	0	188	0	234	0	44	0	250
2004-04-21	2004	112	305	0	23	0	61	0	0	0	0	0	66	0	198	0	42	0	1735	0	31	0	0	0	31	0	89	0	93	0	22	0	89	0	72	0	38	0	0	0	112	0
2004-06-08	2004	160	0	254	0	0	11	0	0	0	0	0	25	0	0	416	11	0	158	1837	2	0	0	0	9	0	0	0	0	0	0	0	2	0	37	0	0	0	0	0	12	0
2004-06-24	2004	176	291	0	0	0	64	0	0	0	0	0	70	0	166	0	47	0	1658	0	0	0	0	0	29	0	0	0	0	0	7	0	0	0	1	0	0	0	0	0	111	0
2004-07-10	2004	192	281	0	0	0	47	0	0	0	0	0	70	0	161	0	30	0	1612	0	0	0	0	0	32	0	0	0	0	0	7	0	0	0	0	0	0	0	0	0	98	0
2004-07-26	2004	208	279	0	0	0	10	0	0	0	0	0	52	0	123	49	15	0	1286	0	0	0	0	0	16	0	0	0	0	0	0	0	0	0	0	0	0	0	0	0	67	0
2004-08-11	2004	224	284	0	0	0	0	0	0	0	0	0	26	0	161	0	16	0	1125	0	0	0	0	0	10	0	0	0	0	0	0	0	0	0	0	0	0	0	0	0	49	0
2004-08-27	2004	240	173	128	0	0	36	0	0	0	0	0	54	0	0	343	10	0	651	0	0	0	0	0	2	0	0	0	0	0	0	0	0	0	0	0	0	0	0	0	40	0
2004-09-12	2004	256	0	547	0	47	0	102	0	0	0	0	0	93	0	583	0	161	706	1164	0	0	0	0	0	38	0	7	0	299	0	0	0	33	0	88	0	0	0	0	0	250
2004-09-28	2004	272	160	155	0	0	17	0	0	0	0	0	54	0	152	0	16	0	289	0	0	0	0	0	13	0	0	0	0	0	0	0	0	0	0	0	0	0	0	0	71	0
2004-10-14	2004	288	61	382	0	0	3	0	0	0	0	0	49	0	154	0	18	0	179	0	0	0	0	0	0	0	0	0	0	0	0	0	0	0	0	0	0	0	0	0	69	0
2004-10-30	2004	304	0	547	0	103	0	102	0	16	0	7	0	93	0	583	0	220	5	2530	0	154	0	3	0	51	0	755	0	217	0	68	0	141	0	188	0	234	0	43	0	250
2004-12-17	2004	352	0	542	0	9	0	100	0	0	0	0	0	88	0	583	0	191	0	2582	0	151	0	0	0	51	0	741	0	184	0	13	0	319	0	188	0	231	0	0	0	250
2005-01-18	2005	18	41	457	0	0	0	102	0	0	0	0	17	55	0	577	0	154	0	2562	0	0	0	0	0	51	0	43	0	0	0	0	0	0	0	165	0	53	0	22	1	238
2005-02-03	2005	34	122	324	0	0	58	0	0	0	0	0	66	0	26	331	0	144	380	1425	0	0	0	0	26	0	0	0	0	0	0	0	0	0	1	0	0	0	0	0	27	133
2005-02-19	2005	50	150	252	0	0	60	0	1	0	0	0	64	0	10	367	28	0	795	972	0	0	0	0	27	0	0	0	0	0	2	0	0	0	0	0	0	0	0	0	46	111
2005-03-07	2005	66	289	0	0	0	58	0	0	0	0	0	63	0	194	0	34	0	1555	0	0	0	0	0	26	0	0	0	0	0	0	0	0	0	0	0	0	0	0	0	130	0
2005-03-23	2005	82	0	547	0	105	0	102	0	16	0	7	0	93	0	583	0	220	0	2582	0	154	0	5	0	51	0	755	0	353	0	68	0	319	0	188	0	234	0	44	0	250
2005-04-08	2005	98	169	158	0	0	56	0	1	0	0	0	64	0	194	0	0	220	1521	0	0	0	0	0	24	0	1	0	0	0	1	0	0	0	77	0	0	0	21	0	120	0
2005-04-24	2005	114	0	547	0	0	4	11	0	16	0	7	0	93	0	491	0	177	0	2582	2	0	0	5	0	51	0	0	0	114	0	68	0	307	0	188	0	209	0	44	0	241
2005-05-26	2005	146	14	454	0	0	7	0	0	0	0	0	31	0	188	41	24	0	518	236	0	0	0	0	9	0	0	0	0	0	0	0	0	0	0	0	0	0	0	0	74	0
2005-06-11	2005	162	0	547	0	0	0	0	0	0	0	0	1	0	0	583	19	0	16	1539	0	0	0	0	0	0	0	0	0	0	0	0	0	0	0	0	0	0	0	0	76	0
2005-06-27	2005	178	0	547	0	105	0	102	0	16	0	7	0	93	0	583	0	220	0	2582	0	154	0	5	0	51	0	755	0	353	0	68	0	319	0	188	0	234	0	44	0	250
2005-07-13	2005	194	0	510	0	0	0	0	0	0	0	0	0	0	63	381	12	0	111	430	0	0	0	0	0	0	0	0	0	0	0	0	0	0	0	0	0	0	0	0	0	189
2005-08-14	2005	226	0	387	0	0	0	102	0	0	0	0	48	0	0	494	2	0	1052	441	0	0	0	0	8	0	0	0	0	0	0	0	0	0	0	0	0	0	1	0	5	143
2005-08-30	2005	242	0	547	0	0	0	102	0	0	0	0	0	93	0	503	0	136	3	2518	0	0	0	0	0	51	0	0	0	0	0	0	0	0	0	0	0	217	0	0	0	250
2005-09-15	2005	258	0	547	0	0	0	102	0	0	0	0	0	92	0	583	5	0	12	2441	0	0	0	0	22	0	0	0	0	0	0	0	0	0	0	0	0	0	0	0	0	240
2005-10-17	2005	290	0	547	0	105	0	102	0	16	0	7	0	93	0	583	0	220	0	2582	0	154	0	5	0	51	0	755	0	353	0	68	0	319	0	188	0	234	0	44	0	250
2005-11-18	2005	322	0	547	0	105	0	102	0	16	0	7	0	93	0	421	0	220	0	2582	0	154	0	5	0	51	0	755	0	353	0	68	0	319	0	188	0	226	0	44	0	250
2006-02-22	2006	53	0	547	0	105	26	21	0	0	0	0	45	0	0	583	0	215	17	2438	0	154	0	0	20	0	0	755	0	353	0	0	0	300	0	188	6	144	6	0	0	196
2006-03-10	2006	69	141	228	0	0	49	0	0	0	0	0	56	0	179	0	13	0	556	1227	0	0	0	0	25	0	44	0	0	0	0	0	125	0	123	0	134	0	14	0	66	128
2006-05-13	2006	133	0	547	0	4	0	102	0	16	0	7	0	93	0	583	0	220	23	2559	0	119	0	5	0	51	0	0	0	14	0	68	0	319	0	188	0	234	0	44	0	250
2006-05-29	2006	149	192	0	0	0	0	0	0	0	0	0	1	0	31	461	0	0	431	204	0	0	0	0	6	0	0	0	0	0	0	0	0	0	72	0	0	0	0	0	37	121
2006-06-14	2006	165	0	547	0	105	0	102	0	16	0	7	0	93	0	481	0	220	0	2582	0	154	0	5	0	51	0	755	0	353	0	68	0	319	0	188	0	234	0	44	0	250
2006-06-30	2006	181	4	528	0	0	17	0	0	0	0	0	1	0	161	0	0	0	1062	0	0	0	0	0	1	0	0	0	0	0	0	0	0	0	60	0	0	0	0	0	87	0
2006-08-01	2006	213	172	0	0	0	0	0	0	0	0	0	0	0	135	0	0	0	778	0	0	0	0	0	0	0	0	0	0	0	0	0	0	0	0	0	0	0	0	0	26	0
2006-08-17	2006	229	0	547	0	105	0	102	0	16	0	7	0	93	0	583	0	220	0	2582	0	154	0	5	0	51	0	755	0	353	0	68	0	319	0	188	0	234	0	44	0	250
2006-09-18	2006	261	0	494	0	0	0	102	0	16	0	0	0	93	0	583	11	158	790	859	0	0	0	5	0	51	96	0	23	0	0	0	0	0	23	0	0	0	0	0	0	250
2006-11-21	2006	325	0	547	0	105	0	102	0	16	0	7	0	93	0	583	0	220	0	2582	0	154	0	5	0	51	0	755	0	353	0	68	0	319	0	188	0	234	0	44	0	250
2006-12-23	2006	357	0	547	0	105	0	102	0	16	0	7	0	93	0	583	0	220	0	2582	0	154	0	5	0	51	0	755	0	353	0	68	0	319	0	188	0	234	0	44	0	250
2007-01-08	2007	8	0	547	0	105	0	102	0	16	0	7	0	93	0	583	0	220	0	2582	0	154	0	5	0	51	0	755	0	353	0	68	0	319	0	188	0	234	0	44	0	250
2007-01-24	2007	24	232	0	0	0	36	0	0	0	0	0	50	0	177	0	23	0	1146	0	0	0	0	0	8	0	5	0	0	0	0	0	0	0	1	0	0	0	0	0	138	0
2007-02-09	2007	40	0	547	0	105	0	102	0	16	0	7	0	93	0	578	0	220	0	2489	0	154	0	5	0	51	0	755	0	353	0	68	0	319	0	188	0	234	0	44	0	250
2007-02-25	2007	56	0	547	0	21	41	4	0	0	0	7	0	90	8	376	1	93	0	2582	0	68	0	5	0	46	7	0	0	96	0	63	0	319	0	188	0	234	0	44	0	250
2007-03-13	2007	72	249	0	0	0	43	0	0	0	0	0	59	0	198	0	29	0	1491	0	0	0	0	0	15	0	0	0	0	0	0	0	0	0	0	0	0	0	0	0	167	0
2007-03-29	2007	88	0	547	0	105	0	102	0	16	0	7	0	93	0	583	0	220	0	2582	0	154	0	5	0	51	0	755	0	353	0	68	0	319	0	188	0	234	0	44	0	250
2007-04-14	2007	104	0	547	0	105	0	102	0	16	0	7	0	93	0	574	0	220	0	2582	0	154	0	5	0	51	0	755	0	353	0	68	0	319	0	188	0	234	0	44	0	250
2007-04-30	2007	120	0	547	0	105	0	102	0	16	0	7	0	93	0	583	0	220	0	2582	0	154	0	5	0	51	0	755	0	353	0	68	0	319	0	188	0	234	0	44	0	250
2007-05-16	2007	136	0	547	0	18	0	102	0	0	0	7	0	93	0	583	0	220	0	2582	29	0	0	5	0	51	49	54	4	71	0	68	0	319	0	188	0	234	0	44	0	250
2007-06-01	2007	152	0	547	0	105	14	72	0	16	0	7	0	93	0	583	0	189	0	2582	0	154	0	5	0	51	0	755	0	152	0	64	0	319	0	188	0	234	0	44	0	250
2007-06-17	2007	168	0	547	0	105	0	102	0	16	0	7	0	93	0	583	0	220	0	2582	0	154	0	5	0	51	0	755	0	353	0	68	0	319	0	188	0	234	0	44	0	250
2007-07-03	2007	184	257	0	0	0	0	0	0	0	0	0	0	0	161	0	18	0	575	0	0	0	0	0	0	0	0	0	0	0	0	0	0	0	0	0	0	0	0	0	124	0
2007-07-19	2007	200	224	0	0	0	0	0	0	0	0	0	0	0	165	0	14	0	155	0	0	0	0	0	0	0	0	0	0	0	0	0	0	0	0	0	0	0	0	0	87	0
2007-08-04	2007	216	189	0	0	0	0	0	0	0	0	0	0	0	102	95	4	0	20	0	0	0	0	0	0	0	0	0	0	0	0	0	0	0	0	0	0	0	0	0	52	0
2007-08-20	2007	232	0	472	0	14	0	54	0	16	0	3	0	93	37	270	0	199	8	1746	0	0	0	5	2	0	0	464	0	259	0	28	0	0	0	188	0	203	0	44	0	239
2007-09-05	2007	248	37	336	0	11	0	65	0	0	0	0	0	93	0	583	0	161	536	0	0	6	0	5	0	51	0	515	0	0	0	52	0	45	0	182	0	217	3	0	0	249
2007-09-21	2007	264	0	547	0	105	0	102	0	16	0	7	0	93	160	0	0	220	0	2582	0	154	0	5	0	51	0	755	0	353	0	68	0	284	0	177	0	234	0	44	0	250
2008-03-15	2008	75	0	547	0	105	0	102	0	16	0	7	0	93	0	583	0	220	0	2582	0	154	0	5	0	51	0	755	0	353	0	68	0	319	0	188	0	234	0	44	0	250
2008-08-06	2008	219	0	529	0	0	0	102	0	0	0	0	0	93	0	583	0	143	0	2582	0	122	0	0	0	51	0	61	0	31	0	52	0	177	0	188	0	234	0	44	0	250
2008-08-22	2008	235	0	485	0	105	0	102	0	16	0	7	0	93	44	78	0	220	61	341	0	154	0	5	0	51	0	730	0	353	0	0	0	0	0	0	0	0	0	0	0	250
2008-10-25	2008	299	0	547	0	105	0	102	0	16	0	7	0	93	0	583	0	220	0	2582	0	154	0	5	0	51	0	755	0	353	0	68	0	319	0	188	0	234	0	44	0	250
2009-01-13	2009	13	0	547	0	105	0	102	0	16	0	7	0	93	0	583	0	220	0	2582	0	154	0	5	0	51	0	755	0	353	0	68	0	319	0	188	0	234	0	44	0	250
2009-02-14	2009	45	271	0	34	0	65	0	0	0	0	0	66	0	179	1	95	0	1570	259	71	0	2	0	32	0	436	0	163	0	0	0	113	0	98	0	138	0	34	0	137	0
2009-04-03	2009	93	295	0	37	0	64	0	9	0	3	0	71	0	0	576	117	0	11	2429	74	0	0	5	32	0	446	0	169	0	0	0	7	219	0	188	0	234	0	44	45	176
2009-04-19	2009	109	0	547	0	105	0	102	0	16	0	7	0	93	0	583	0	220	0	2582	0	154	0	5	0	51	0	755	0	353	0	68	0	319	0	188	0	234	0	44	0	250
2009-05-05	2009	125	293	0	23	0	67	0	2	0	3	0	71	0	325	0	106	0	1700	0	64	0	3	0	32	0	319	0	148	0	0	0	125	0	85	0	144	0	30	0	172	0
2009-05-21	2009	141	4	389	2	0	23	0	0	0	0	0	41	0	6	188	65	0	145	1954	48	0	0	0	14	0	157	0	75	0	0	0	74	0	66	0	103	0	25	0	57	89
2009-06-06	2009	157	0	547	0	0	54	15	0	0	0	0	68	0	0	583	0	220	5	2542	0	56	0	5	0	51	132	58	38	0	0	68	28	0	13	123	5	175	21	0	141	27
2009-06-22	2009	173	265	0	0	0	27	0	0	0	0	0	68	0	261	0	62	0	1554	0	0	0	0	0	29	0	88	0	0	0	0	0	0	0	14	0	41	0	10	0	125	0
2009-07-08	2009	189	0	547	0	71	19	73	0	0	0	0	60	7	270	0	2	174	145	2221	0	88	0	0	10	0	0	561	0	0	0	65	0	0	0	0	11	0	0	0	42	159
2009-07-24	2009	205	260	0	0	0	0	0	0	0	0	0	49	0	220	0	34	0	424	0	0	0	0	0	1	0	0	0	0	0	0	0	0	0	0	0	0	0	0	0	72	0
2009-08-09	2009	221	0	547	0	104	0	23	0	0	0	4	46	0	159	331	0	218	17	2379	0	132	0	5	0	51	0	117	0	353	0	0	0	182	0	188	0	87	0	44	18	80
2009-08-25	2009	237	0	547	0	0	0	102	0	16	0	0	0	93	0	583	0	195	0	2582	0	154	0	5	0	51	0	711	0	346	0	68	0	191	0	188	0	0	0	44	0	250
2009-09-10	2009	253	215	0	0	0	0	0	0	0	0	0	6	0	214	0	13	0	19	0	0	0	0	0	0	0	0	0	0	0	0	0	0	0	0	0	0	0	0	0	42	0
2009-09-26	2009	269	0	547	0	105	0	102	0	16	0	7	0	93	0	583	0	220	0	2582	0	154	0	5	0	51	0	755	0	353	0	68	0	319	0	188	0	234	0	44	0	250
2009-10-12	2009	285	235	0	0	0	44	0	0	0	0	0	61	0	198	0	50	0	1455	0	85	0	0	0	30	0	488	0	25	0	0	0	0	0	0	0	0	0	0	0	93	0
2009-10-28	2009	301	0	547	0	105	0	102	0	16	0	7	0	93	0	583	0	220	0	2582	0	154	0	5	0	51	0	755	0	353	0	68	0	319	0	188	0	234	0	44	0	250
2009-11-13	2009	317	0	547	0	105	0	102	0	16	0	7	0	93	0	583	0	220	0	2582	0	154	0	5	0	51	0	755	0	353	0	68	0	319	0	188	0	234	0	44	0	250
2009-11-29	2009	333	0	547	0	105	0	102	0	16	0	7	0	93	0	583	0	220	0	2582	0	154	0	5	0	51	0	755	0	353	0	68	0	319	0	188	0	234	0	44	0	250
2010-01-16	2010	16	0	547	0	105	0	102	0	16	0	7	0	93	0	583	0	220	0	2582	0	154	0	5	0	51	0	755	0	353	0	68	0	319	0	188	0	234	0	44	0	250
2010-02-01	2010	32	336	0	70	0	66	0	0	0	2	0	67	0	274	88	93	84	1570	241	129	0	5	0	31	0	483	167	175	7	42	0	186	0	137	0	151	0	34	0	166	32
2010-02-17	2010	48	0	547	0	105	0	102	0	16	0	7	0	93	0	583	0	220	0	2582	0	154	0	5	0	51	0	755	0	353	0	68	0	319	0	188	0	234	0	44	0	250
2010-03-05	2010	64	0	547	0	105	0	102	0	16	0	7	0	93	0	583	0	220	0	2582	0	154	0	5	0	51	0	755	0	353	0	68	0	319	0	188	0	234	0	44	0	250
2010-04-06	2010	96	0	547	0	105	0	102	0	16	0	7	0	93	88	0	0	220	0	2582	0	154	0	5	0	51	0	755	0	353	0	68	0	319	0	188	0	234	0	44	0	250
2010-04-22	2010	112	0	547	0	105	0	102	0	16	0	7	0	93	0	583	0	220	0	2582	0	154	0	5	0	51	0	755	0	353	0	68	0	319	0	188	0	234	0	44	0	250
2010-05-08	2010	128	199	250	0	105	0	102	0	16	0	7	0	93	40	472	190	0	503	1774	138	0	0	5	0	51	422	263	25	322	48	0	149	164	167	0	192	0	36	0	0	250
2010-05-24	2010	144	390	0	73	0	62	0	1	0	5	0	67	0	421	0	164	0	1732	0	126	0	2	0	29	0	618	0	199	0	48	0	223	0	115	0	159	0	35	0	194	0
2010-07-11	2010	192	330	0	58	0	58	0	0	0	0	0	65	0	402	0	139	0	1580	167	109	0	0	0	28	0	523	0	177	0	44	0	211	0	82	0	101	0	31	0	167	0
2010-07-27	2010	208	311	0	45	0	60	0	0	0	0	0	70	0	341	0	113	0	1687	0	96	0	0	0	28	0	452	0	154	0	43	0	183	0	75	0	82	0	28	0	156	0
2010-08-12	2010	224	317	0	41	0	62	0	0	0	1	0	67	0	336	0	105	0	1075	788	86	0	0	0	30	0	379	0	93	0	48	0	160	0	67	0	92	0	25	0	171	0
2010-09-13	2010	256	162	243	25	0	62	0	0	0	1	0	66	0	174	213	58	68	385	1921	77	0	0	0	30	0	275	0	0	230	43	0	70	105	0	188	38	120	0	44	150	0
2010-09-29	2010	272	210	149	22	0	63	0	0	0	0	0	62	0	16	522	92	0	1073	891	79	0	0	0	4	34	278	43	0	301	44	0	126	37	60	0	78	0	26	0	139	47
2010-10-15	2010	288	50	449	28	0	70	0	0	0	2	0	72	0	225	217	103	0	1076	820	85	0	1	0	31	0	307	0	42	171	45	0	64	165	69	0	94	0	29	0	150	40
2010-10-31	2010	304	0	547	0	105	0	102	0	16	0	7	0	93	0	583	0	220	0	2582	0	154	0	5	0	51	0	755	0	353	0	68	0	319	0	188	0	234	0	44	0	250
2010-11-16	2010	320	135	268	7	0	63	0	0	0	0	0	32	0	145	0	50	0	140	2175	79	0	0	0	16	0	188	47	7	199	27	19	2	248	0	135	64	0	0	39	163	0
2010-12-02	2010	336	0	547	0	105	71	0	0	0	3	0	59	0	0	576	0	220	0	2582	0	154	0	0	28	0	12	624	0	353	0	68	0	319	0	188	0	234	0	44	198	0
2010-12-18	2010	352	0	547	0	105	0	102	0	16	0	7	0	93	0	583	0	220	0	2582	0	154	0	5	0	51	0	755	0	353	0	68	0	319	0	188	0	234	0	44	0	250
2011-01-19	2011	19	0	547	0	105	30	54	1	0	0	7	0	92	0	583	0	220	0	2582	0	154	0	0	0	51	0	755	0	353	0	68	0	319	0	188	0	234	0	44	33	193
2011-02-04	2011	35	305	0	54	0	57	0	0	0	0	0	1	0	21	391	126	0	1742	0	91	0	0	0	17	0	463	0	168	0	44	0	205	0	100	0	99	0	32	0	169	0
2011-02-20	2011	51	0	547	0	105	0	102	0	16	0	7	0	93	0	583	0	220	0	2582	0	154	0	5	0	51	0	755	0	353	0	68	0	319	0	188	0	234	0	44	0	250
2011-03-08	2011	67	0	547	0	105	0	102	0	16	0	7	0	93	0	583	0	220	0	2582	0	154	0	5	0	51	0	755	0	353	0	68	0	319	0	188	0	234	0	44	0	250
2011-03-24	2011	83	0	547	0	105	0	102	0	16	0	7	0	93	0	583	0	220	0	2582	0	154	0	5	0	51	0	755	0	353	0	68	0	319	0	188	0	234	0	44	0	250
2011-04-09	2011	99	361	0	60	0	52	0	1	0	1	0	64	0	395	0	152	0	1835	0	105	0	1	0	29	0	484	0	160	0	48	0	232	0	123	0	149	0	32	0	201	0
2011-04-25	2011	115	0	547	0	105	0	102	0	16	0	7	0	93	0	583	0	220	0	2582	0	154	0	5	0	51	0	755	0	353	0	68	0	319	0	188	0	234	0	44	0	250
2011-05-11	2011	131	0	547	0	105	0	102	0	16	0	7	0	93	0	583	0	220	0	2582	0	154	0	5	0	51	0	755	0	353	0	68	0	319	0	188	0	234	0	44	0	250
2011-06-12	2011	163	236	0	55	0	51	0	0	0	0	0	62	0	325	56	100	0	1928	66	89	0	0	0	28	0	448	0	149	0	27	0	202	0	111	0	98	0	33	0	163	0
2011-06-28	2011	179	292	0	42	0	53	0	0	0	0	0	66	0	386	0	119	0	1941	0	86	0	0	0	30	0	339	0	121	0	45	0	193	0	93	0	86	0	30	0	157	0
2011-09-16	2011	259	13	425	0	0	9	0	0	0	0	0	68	0	0	533	66	0	326	2007	42	0	0	0	28	0	35	0	0	0	32	0	0	319	0	188	58	0	0	0	148	0
2011-10-02	2011	275	0	547	0	55	0	101	0	0	0	7	3	86	0	583	97	0	0	2580	0	153	0	5	0	51	0	477	0	326	0	68	0	319	0	187	0	232	0	44	0	250
